# Supplementary material for: In Vitro Evaluation and Mitigation of Niclosamide’s Liabilities as a COVID-19 Treatment
Source: MDPI journal article supplement (doi:10.3390/vaccines10081284), 2022-08-09
Supplement: s1 [file s1]

## Supplemental Figures

A.)

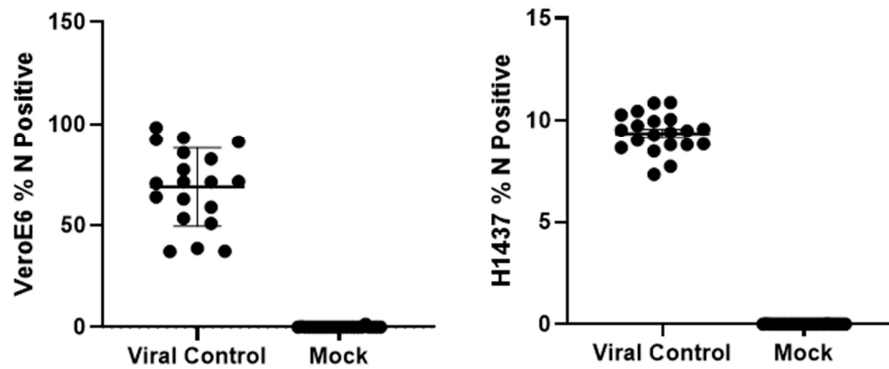

B.)

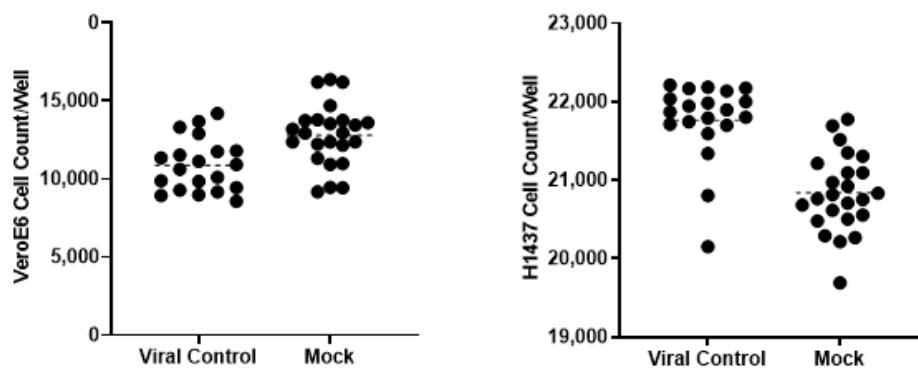

**Supplemental Figure S1.** Control data for VeroE6 and H1437 SARS-CoV-2 long-term exposure bioassays. Data were analyzed in GraphPad Prism 9.0 and is shown as mean  $\pm$  standard deviation for  $n = 20$  replicates per condition. A.) Raw percent N protein positivity. Average percent infection was 69% for VeroE6 and 9% for H1437. This data was used to determine a normalized percent infection for treated wells. B.) Cell observations per well. Viral control data was used to determine a percent viability score for treated wells.

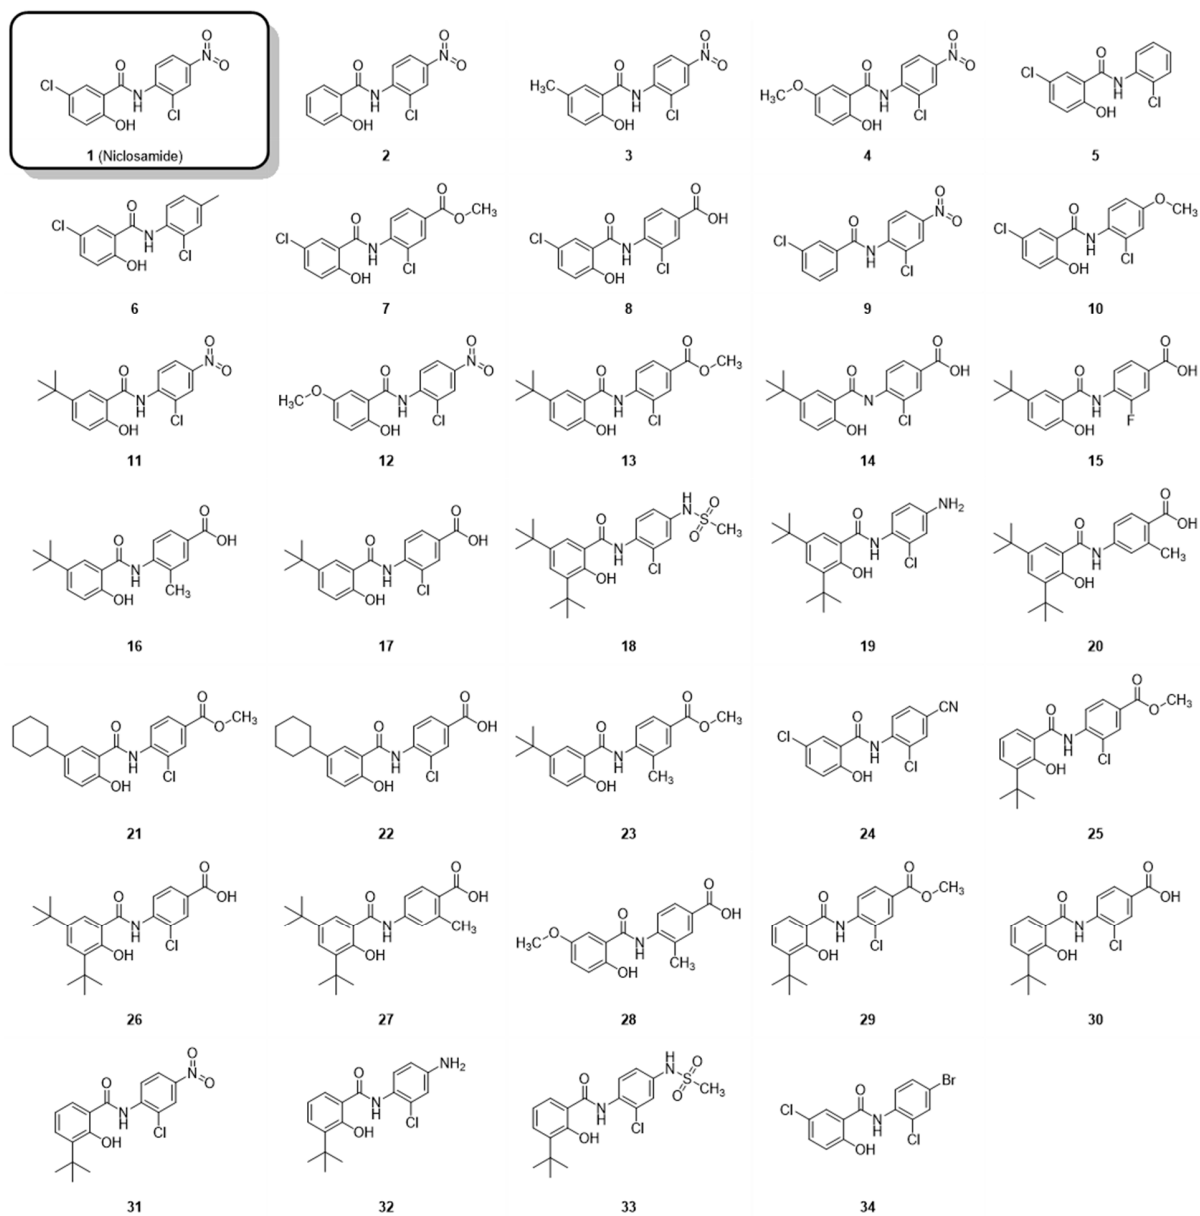

**Supplementary Figure S2.** Niclosamide analog structures. Modifications were made to the chlorosalicylic acid and/or nitroaniline rings. Compound number is indicated below the structure. Structures were generated using ChemDraw version 21.0 (PerkinElmer, Waltham, Massachusetts, United States).

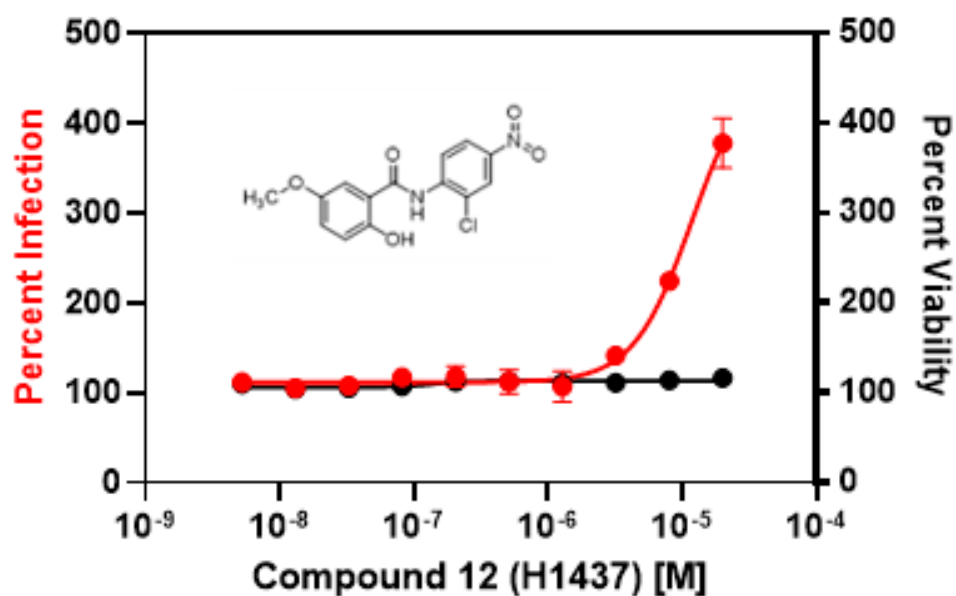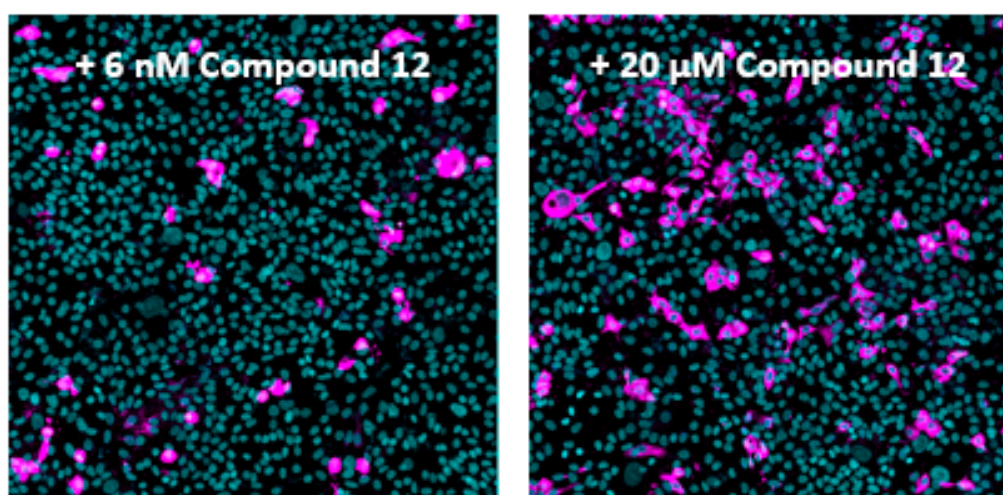

**Supplemental Figure S3. Some niclosamide analogs cause dose-dependent exacerbation of infection in H1437.** As a representative example, compound 12 causes a 400% increase in infection at 20  $\mu$ M. A concentration-response curve for infection is shown here along with representative images for a non-exacerbating concentration (6 nM) and an exacerbating concentration (20  $\mu$ M). Images were captured at 20X magnification using a Yokogawa CV8000

high content imaging microscope and processed using ImageJ. Nuclei are colored in cyan and SARS-CoV-2 N protein is colored in magenta.
